# Supplementary material for: Effectiveness, efficiency and adverse effects of using direct or indirect bonding technique in orthodontic patients: a systematic review and meta-analysis
Source: PubMed Central journal article supplement (PMC6615229; doi:10.1186/s12903-019-0831-4), 2019-07-08

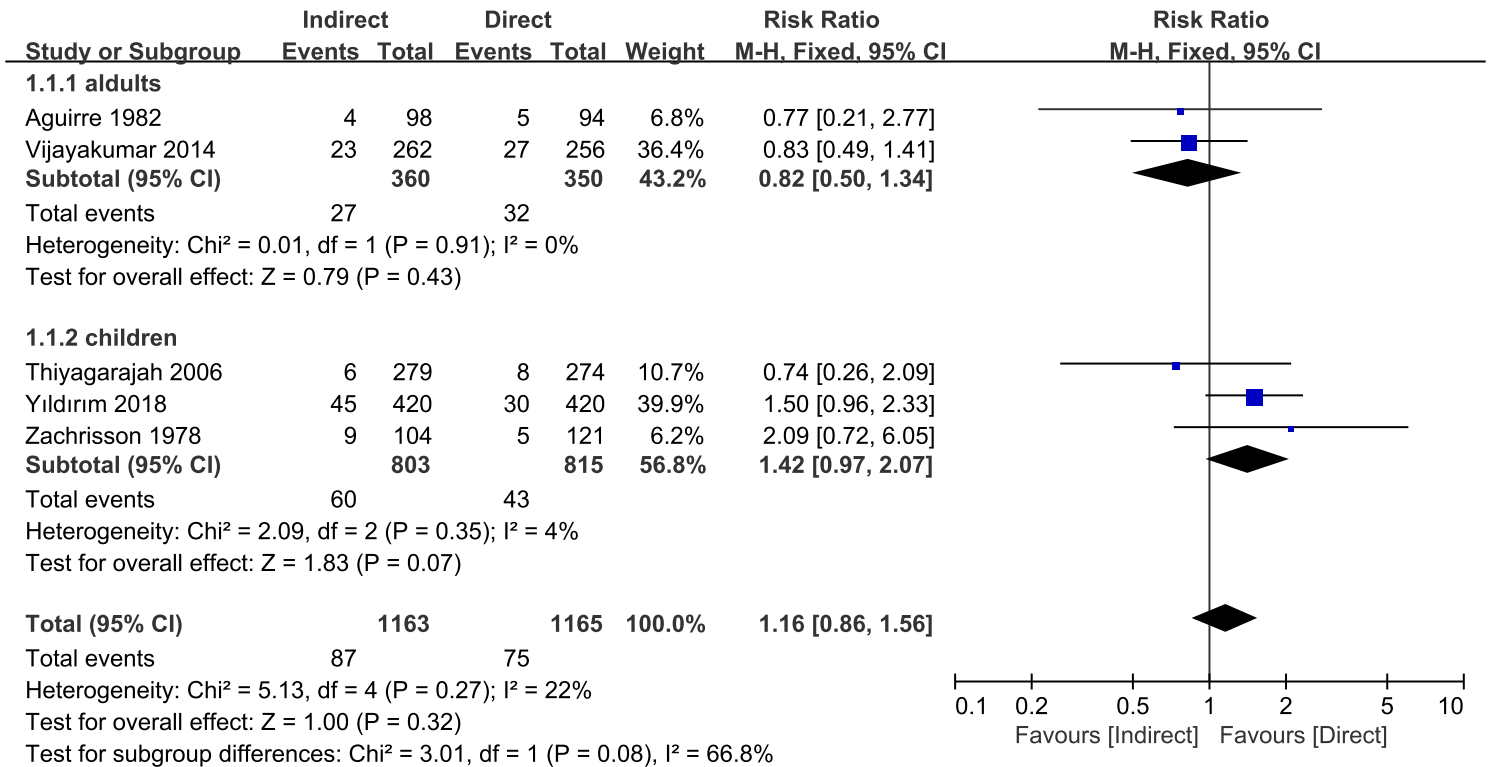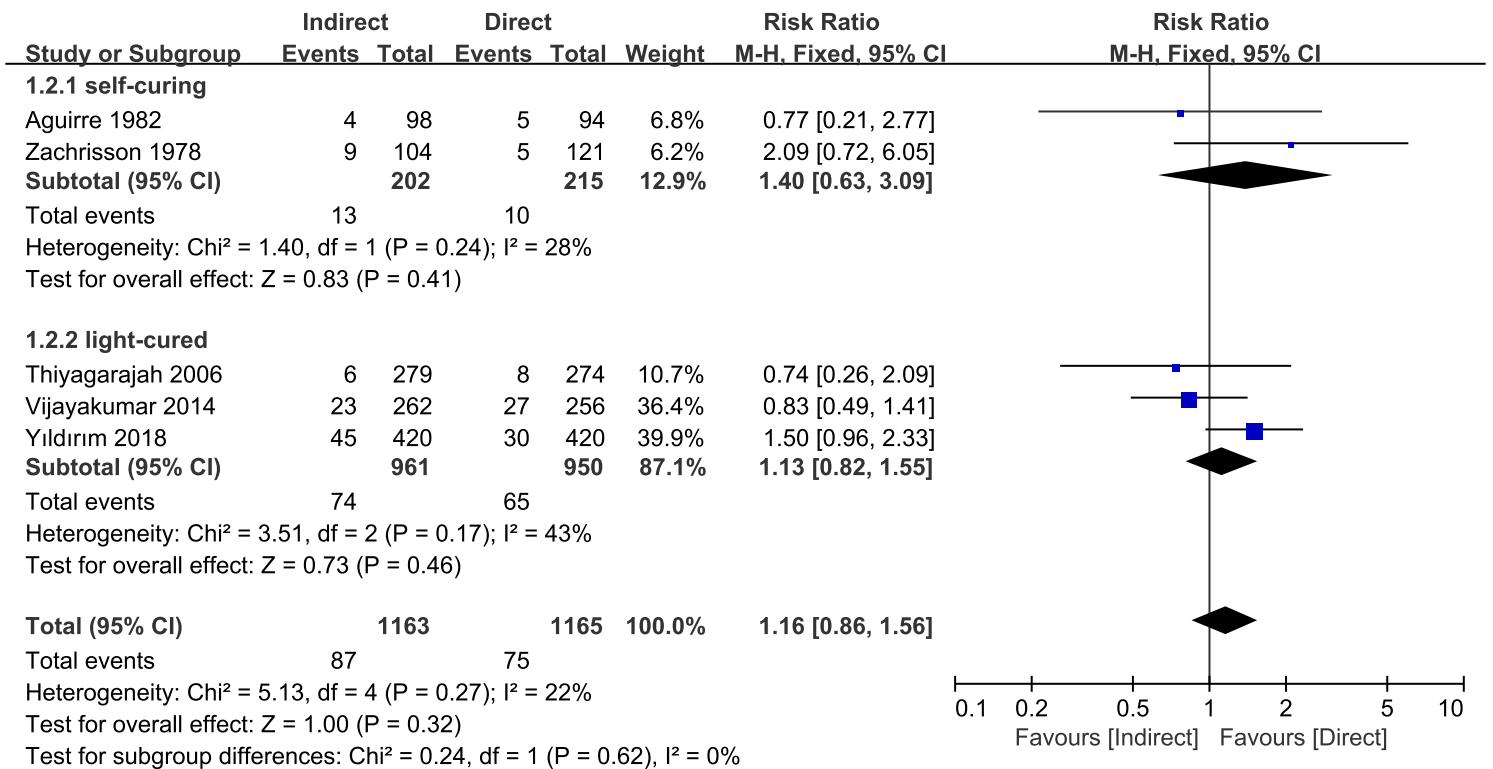

Supplement: 12903_2019_831_MOESM1_ESM.pdf [file 12903_2019_831_MOESM1_ESM.pdf]
